# Supplementary material
Source: MDPI journal article supplement (https://www.mdpi.com/2039-4403/14/1/11)
Supplement: s1 [file s1]

Supplementary Table S1. Contents taught in both groups

| List of topics                 |
|--------------------------------|
| 1. The Behavioral Theory       |
| 2. Types of conditioning       |
| 3. Classical conditioning      |
| 4. Operant conditioning        |
| 5. Behavior modification tools |
